# Supplementary material for: Effect of population screening for type 2 diabetes and cardiovascular risk factors on mortality rate and cardiovascular events: a controlled trial among 1,912,392 Danish adults
Source: Springer Nature journal article supplement (doi:10.1007/s00125-017-4323-2), 2017-08-19
Supplement: MOESM1 [file 14232618]

**ESM Table One Cause-specific mortality groupings by ICD-10 code**

| <b>Cause-specific mortality</b>   | <b>ICD-10 code used</b>                                                                    |
|-----------------------------------|--------------------------------------------------------------------------------------------|
| Cardiovascular                    | F01*, I*                                                                                   |
| Cancer                            | C*, D0* to D4*,                                                                            |
| Suicide / violence / accident     | F1*, V*, W*, X*, Y*                                                                        |
| Other                             | A*, B*, D5* to D8*, E*, F00*, F02* to F09*, F2* to F9*, G*, H*, J*, K*, L*, M*, N*, P*, Q* |
| Unknown                           | R*                                                                                         |
| <b>Diabetes-related mortality</b> | E10* to E14*                                                                               |
